# Supplementary material
Source: PubMed Central journal article supplement (PMC7171583)
Supplement: jamainternmed-180-888-s001.pdf [file jamainternmed-180-888-s001.pdf]

## Supplementary Online Content

Colbeth HL, Genere N, Hall CB, et al. Evaluation of medical surveillance and incidence of post-September 11, 2001, thyroid cancer in World Trade Center–exposed firefighters and emergency medical service workers. *JAMA Intern Med*. Published online April 20, 2020. doi:10.1001/jamainternmed.2020.0950

**eTable 1.** Characteristics of WTC-Exposed Fire Department Rescue/Recovery Workers Diagnosed With and Without Thyroid Cancer From 09/12/2001 to 12/31/2018

**eFigure.** Fire Department Male Thyroid Cancer Cases Diagnosed per Year by Detection Method, 2001-2018

**eTable 2.** Age-Adjusted Relative Rates for Secondary and Sensitivity Analyses

This supplementary material has been provided by the authors to give readers additional information about their work.

**eTable 1. Characteristics of WTC-exposed Fire Department rescue/recovery workers diagnosed with and without thyroid cancer from 09/12/2001 to 12/31/2018.**

| Variable                                                                                                                                                                                                   | All Cases <sup>a</sup>            | Non-Cases          |
|------------------------------------------------------------------------------------------------------------------------------------------------------------------------------------------------------------|-----------------------------------|--------------------|
|                                                                                                                                                                                                            | (n=72)                            | (n=14,915)         |
| WTC arrival group                                                                                                                                                                                          |                                   |                    |
| Morning of 9/11                                                                                                                                                                                            | 13 (18.1)                         | 2289 (15.4)        |
| Afternoon of 9/11                                                                                                                                                                                          | 32 (44.4)                         | 6841 (45.9)        |
| 9/12/2001                                                                                                                                                                                                  | 12 (16.7)                         | 2737 (18.4)        |
| 9/13/2001-9/24/2001                                                                                                                                                                                        | 14 (19.4)                         | 2606 (17.5)        |
| After 9/24/2001                                                                                                                                                                                            | 1 (1.4)                           | 442 (3.0)          |
| WTC work duration - months                                                                                                                                                                                 |                                   |                    |
| Median [IQR]                                                                                                                                                                                               | 3.0 [1.0 – 6.0]                   | 2.0 [1.0 - 5.0]    |
| Sex                                                                                                                                                                                                        |                                   |                    |
| Male                                                                                                                                                                                                       | 72 (100)                          | 14,915 (100)       |
| Age on 9/11                                                                                                                                                                                                |                                   |                    |
| Median [IQR]                                                                                                                                                                                               | 38.9 [32.8 - 47.6]                | 40.0 [33.7 - 46.3] |
| Race                                                                                                                                                                                                       |                                   |                    |
| White                                                                                                                                                                                                      | 64 (88.9)                         | 13137 (88.1)       |
| Nonwhite                                                                                                                                                                                                   | 8 (11.1)                          | 1778 (11.9)        |
| Current smoking status                                                                                                                                                                                     |                                   |                    |
| Never smoker                                                                                                                                                                                               | 51 (70.8)                         | 9132 (61.2)        |
| Ever smoker                                                                                                                                                                                                | 19 (26.4)                         | 5514 (37.0)        |
| Unknown                                                                                                                                                                                                    | 2 (2.8)                           | 269 (1.8)          |
| BMI at end of follow-up <sup>b</sup>                                                                                                                                                                       |                                   |                    |
| Mean (SD)                                                                                                                                                                                                  | 30.6 (3.8)                        | 30.4 (4.9)         |
| Work assignment                                                                                                                                                                                            |                                   |                    |
| Firefighter                                                                                                                                                                                                | 65 (90.3)                         | 13178 (88.4)       |
| Emergency medical service                                                                                                                                                                                  | 7 (9.7)                           | 1737 (11.7)        |
| Deceased                                                                                                                                                                                                   |                                   |                    |
| Yes                                                                                                                                                                                                        | 2 (2.8)                           | 558 (3.7)          |
| Age at diagnosis                                                                                                                                                                                           |                                   |                    |
| Median (IQR) [range]                                                                                                                                                                                       | 50.0 (44.2, 58.2)<br>[26.0, 76.3] | N/A                |
| Years to diagnosis post-9/11                                                                                                                                                                               |                                   |                    |
| Median [IQR]                                                                                                                                                                                               | 11.5 [6.8 - 14.5]                 | N/A                |
| Testing pre-diagnosis <sup>c</sup>                                                                                                                                                                         |                                   |                    |
| Yes                                                                                                                                                                                                        | 38 (52.8)                         | N/A                |
| Thyroid cancer histology                                                                                                                                                                                   |                                   |                    |
| Papillary                                                                                                                                                                                                  | 70 (97.2)                         | N/A                |
| Follicular                                                                                                                                                                                                 | 2 (2.8)                           | N/A                |
| Abbreviations: WTC=World Trade Center; BMI=Body Mass Index.                                                                                                                                                |                                   |                    |
| <sup>a</sup> Includes 7 cases in which no method of detection could be determined.                                                                                                                         |                                   |                    |
| <sup>b</sup> BMI data only available for n=68 cases and n=14,579 non-cases.                                                                                                                                |                                   |                    |
| <sup>c</sup> Includes chest computed tomography (CT), sinus CTs, sleep studies, gastrointestinal tests, echocardiograms, MRIs of the head and neck, stress tests, PET scans, cervical imaging, or surgery. |                                   |                    |

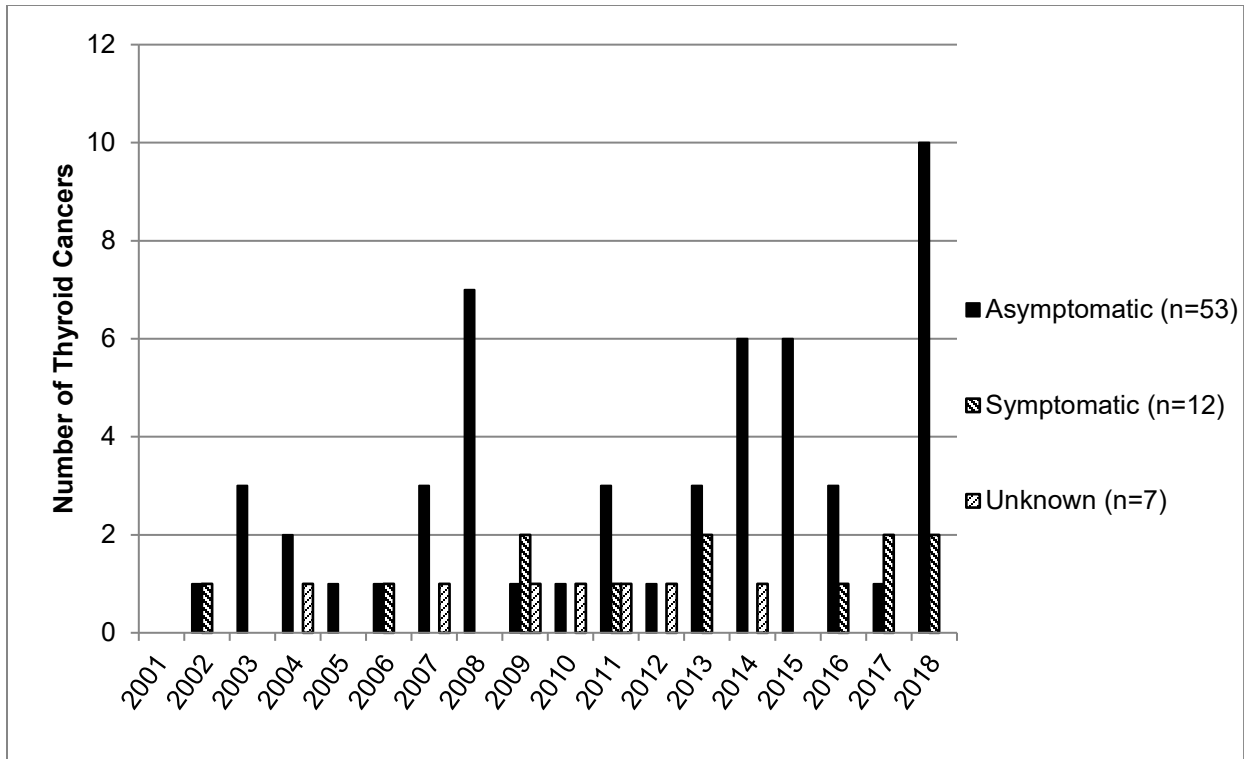

**eFigure. Fire Department male thyroid cancer cases diagnosed per year by detection method, 2001-2018.** Diagnosis years of confirmed Fire Department of the City of New York thyroid cancer cases, separated by asymptomatic, symptomatic, and unknown detect method categorizations.

**eTable 2. Age-adjusted relative rates for secondary and sensitivity analyses.**

| <b>Model</b>                                                                                               | <b>RR</b> | <b>95% CI</b> |
|------------------------------------------------------------------------------------------------------------|-----------|---------------|
| <i>Secondary Analyses: World Trade Center Exposure</i>                                                     |           |               |
| Arrival at WTC site morning of 9/11                                                                        | 2.7       | 1.5-4.8       |
| Arrival at WTC site afternoon of 9/11 or later                                                             | 2.2       | 1.6-3.1       |
| High Duration ( $\geq 3$ months WTC site)                                                                  | 2.4       | 1.6-3.6       |
| Low Duration ( $< 3$ months at WTC site)                                                                   | 2.1       | 1.4-3.2       |
| Arrival at WTC site morning of 9/11 and High Duration                                                      | 2.8       | 1.3-6.1       |
| Arrival at WTC site afternoon of 9/11 or later and Low Duration                                            | 2.3       | 1.6-3.1       |
| <i>Secondary Analysis: Primary analysis restricted to papillary thyroid cancer cases</i>                   |           |               |
| Overall                                                                                                    | 2.4       | 1.7-3.2       |
| Early period <sup>a</sup>                                                                                  | 2         | 1.2-3.3       |
| Late period <sup>b</sup>                                                                                   | 2.5       | 1.6-3.9       |
| Asymptomatic                                                                                               | 3.2       | 2.1-4.7       |
| Symptomatic                                                                                                | 0.9       | 0.5-1.7       |
| <i>Sensitivity Analysis: Primary analysis restricted to 30-79 years</i>                                    |           |               |
| Overall                                                                                                    | 2.3       | 1.7-3.2       |
| Early period <sup>a</sup>                                                                                  | 1.8       | 1.1-3.0       |
| Late period <sup>b</sup>                                                                                   | 2.5       | 1.6-3.8       |
| Asymptomatic                                                                                               | 3.2       | 2.1-4.8       |
| Symptomatic                                                                                                | 1         | 0.5-1.8       |
| <i>Sensitivity Analysis: Primary analysis restricted to papillary thyroid cancer cases and 30-79 years</i> |           |               |
| Overall                                                                                                    | 2.4       | 1.7-3.3       |
| Early period <sup>a</sup>                                                                                  | 1.9       | 1.2-3.3       |
| Late period <sup>b</sup>                                                                                   | 2.5       | 1.6-3.9       |
| Asymptomatic                                                                                               | 3.2       | 2.2-4.8       |
| Symptomatic                                                                                                | 1.1       | 0.6-2.1       |

<sup>a</sup>9/12/2001-12/31/2009<sup>b</sup>01/01/2010-12/31/2018
